# Supplementary material
Source: MDPI journal article supplement (https://www.mdpi.com/1999-4907/11/6/706)
Supplement: s1 [file s1]

Table S1. Six steps to greening (from [73])

|    |                                                                                                                         |
|----|-------------------------------------------------------------------------------------------------------------------------|
| 1. | Identify and analyze existing greening successes                                                                        |
| 2. | Build a grassroots movement for greening and mobilize partner organizations                                             |
| 3. | Address policy and legal issues and improve the enabling conditions for greening                                        |
| 4. | Develop and implement a communication strategy to systematically expand the use of all types of media                   |
| 5. | Develop or strengthen agroforestry value chains to enable farmers to capitalize on the role of the market in scaling up |
| 6. | Expand research activities to fill gaps in knowledge                                                                    |
